# Supplementary material for: Climate-induced patterns of activity and nest conditions select for genes associated with growth and maturation in a widespread lizard species
Source: Research Square preprint supplement (doi:10.21203/rs.3.rs-9941634/v1), 2026-06-12
Supplement: Supplementary file 1 [file 9da551d115d21f98ea1bf4c4.xlsx]

## Sheet: Sheet1
Table 2: A KEGG enrichment analysis on the candidate genes identified 48 genes that significantly enrich for two KEGG pathways. The two pathways for which enrichment was found are the gonadotropin-signaling pathway (Gnrh signaling pathway) and the calcium signaling pathway.
Gene ID	KEGG pathway
ADCY3	Gnrh signaling pathway; Calcium signaling pathway
ADCY4	Gnrh signaling pathway; Calcium signaling pathway
CACNA1A	Calcium signaling pathway
CACNA1B-like (LOC121936315)	Calcium signaling pathway
CACNA1C	Gnrh signaling pathway; Calcium signaling pathway
CACNA1D	Gnrh signaling pathway; Calcium signaling pathway
CACNA1H	Calcium signaling pathway
CALM3	Gnrh signaling pathway; Calcium signaling pathway
CAMK1G	Calcium signaling pathway
CAMK2B	Gnrh signaling pathway; Calcium signaling pathway
CAMK4	Calcium signaling pathway
CCKAR	Calcium signaling pathway
CHRM3	Calcium signaling pathway
EGFR	Gnrh signaling pathway; Calcium signaling pathway
FGF18	Calcium signaling pathway
FGFR3	Calcium signaling pathway
GDNF	Calcium signaling pathway
GNA15	Calcium signaling pathway
GNAS	Gnrh signaling pathway; Calcium signaling pathway
GNRH1	Gnrh signaling pathway
GRM5	Calcium signaling pathway
ITPR2	Gnrh signaling pathway; Calcium signaling pathway
LOC121933610	Gnrh signaling pathway; Calcium signaling pathway
MAP2K3	Gnrh signaling pathway
MAP3K3	Gnrh signaling pathway
MAP3K3-like (LOC121934750)	Gnrh signaling pathway
MAPK13	Gnrh signaling pathway
NFATC1	Calcium signaling pathway
NOS3	Calcium signaling pathway
NTRK3	Calcium signaling pathway
PDGFA	Calcium signaling pathway
PHKB	Calcium signaling pathway
PLA2G4D-like (LOC121926791)	Gnrh signaling pathway
PLA2G4E-like (LOC121926755)	Gnrh signaling pathway
PLA2G4E-like (LOC121926840)	Gnrh signaling pathway
PLCB1	Gnrh signaling pathway; Calcium signaling pathway
PLCB4	Gnrh signaling pathway; Calcium signaling pathway
PLCE1	Calcium signaling pathway
PRKCD	Gnrh signaling pathway
PTGFR	Calcium signaling pathway
PTK2B	Gnrh signaling pathway; Calcium signaling pathway
RET	Calcium signaling pathway
RYR1	Calcium signaling pathway
RYR2	Calcium signaling pathway
SLC8A1	Calcium signaling pathway
SLC8A3	Calcium signaling pathway
TGFA	Calcium signaling pathway
TRDN-like (LOC121925175)	Calcium signaling pathway
