# Supplementary material for: Climate-induced patterns of activity and nest conditions select for genes associated with growth and maturation in a widespread lizard species
Source: Research Square preprint supplement (doi:10.21203/rs.3.rs-9941634/v1), 2026-06-12
Supplement: Supplementary file 2 [file e13154670f99e802d624b929.xlsx]

## Sheet: Sheet1
Table 1: Patterns of activity and nest conditions across centuries as a function of latitude, longitude, and/or elevation. The variables describing adult and hatchling activity were largely predicted by latitude, though longitude and elevation played a role in predicting changes in activity for both age classes. Nest conditions were less tightly correlated with latitude, though latitude did predi…
Biophysical Variable	Lat	Long	Elev	Lat:Long	Lat:Elev	Long:Elev	Lat:Long:Elev
Adult Activity 1900s	<0.001	> 0.05	> 0.05	> 0.05	> 0.05	0.016	>0.05
Adult Activity 2000s	<0.001	> 0.05	> 0.05	> 0.05	> 0.05	> 0.05	> 0.05
Adult ΔActivity	> 0.05	> 0.05	> 0.05	> 0.05	> 0.05	0.009	> 0.05
Hatchling Activity 1900s	<0.001	> 0.05	> 0.05	> 0.05	> 0.05	> 0.05	> 0.05
Hatchling Activity 2000s	<0.001	> 0.05	> 0.05	> 0.05	> 0.05	> 0.05	> 0.05
Hatchling ΔActivity	0.016	0.002	0.034	> 0.05	> 0.05	> 0.05	0.012
Adults Minutes Above CTmax 1900s	<0.001	> 0.05	> 0.05	> 0.05	> 0.05	> 0.05	> 0.05
Adults Minutes Above CTmax 2000s	<0.001	> 0.05	> 0.05	> 0.05	> 0.05	> 0.05	> 0.05
Adult ΔMinutes Above CTmax	<0.001	> 0.05	> 0.05	> 0.05	> 0.05	> 0.05	> 0.05
Hatchling Minutes Above CTmax 1900s	<0.001	> 0.05	> 0.05	> 0.05	> 0.05	> 0.05	> 0.05
Hatchling Minutes Above CTmax 2000s	<0.001	<0.001	> 0.05	> 0.05	> 0.05	> 0.05	> 0.05
Hatchling ΔMinutes Above CTmax	0.003	0.002	> 0.05	> 0.05	> 0.05	> 0.05	0.008
Degree Days Above Mean Temperature	<0.001	> 0.05	0.044	> 0.05	> 0.05	> 0.05	> 0.05
Degree Days Above Max Temperature	> 0.05	> 0.05	> 0.05	> 0.05	> 0.05	> 0.05	> 0.05
Mean Nest Temperatures 1900s	> 0.05	> 0.05	> 0.05	> 0.05	> 0.05	> 0.05	> 0.05
Mean Nest Temperatures 2000s	> 0.05	> 0.05	> 0.05	> 0.05	> 0.05	> 0.05	> 0.05
ΔMean Nest Temperatures	0.008	> 0.05	0.032	> 0.05	0.046	0.04	> 0.05
Range of Nest Temperatures 1900s	0.002	> 0.05	> 0.05	> 0.05	> 0.05	> 0.05	> 0.05
Range of Nest Temperatures 2000s	<0.001	> 0.05	0.043	> 0.05	> 0.05	> 0.05	> 0.05
ΔRange of Nest Temperatures 1900s-2000s	> 0.05	> 0.05	> 0.05	> 0.05	> 0.05	> 0.05	> 0.05
