# Supplementary material for: Climate-induced patterns of activity and nest conditions select for genes associated with growth and maturation in a widespread lizard species
Source: Research Square preprint supplement (doi:10.21203/rs.3.rs-9941634/v1), 2026-06-12
Supplement: Supplementary file 2 [file Supplementary_Materials_Overview.pdf › Supplementary_Materials_Overview.pdf]

## Supplementary Materials

### Manuscript Title:

Climate-induced patterns of activity and nest conditions select for genes associated with growth and maturation in a widespread lizard species

| Name                 | Content                                                                                                                                                    |
|----------------------|------------------------------------------------------------------------------------------------------------------------------------------------------------|
| Table S1             | An Excel file containing the table with information for the samples used in this study.                                                                    |
| Table S2             | An Excel file containing a table with the output of the biophysical models for all fourteen of our study sites.                                            |
| Table S3             | An Excel file containing a table with the output of our comparisons of $R^2$ distributions between our candidate SNPs and randomly generated SNP datasets. |
| Table S4             | An Excel file containing two tables that show all of the genes found in significant linkage with genes that significantly enrich for KEGG terms.           |
| Supplemental Figures | A PDF file that contains supplemental figures one through five. Figure captions contained in the file explain each supplemental figure in more detail.     |
